# Supplementary material for: SYK inhibition thwarts the BAFF - B-cell receptor crosstalk and thereby antagonizes Mcl-1 in chronic lymphocytic leukemia
Source: PubMed Central journal article supplement — Haematologica. 2017 Aug 24;102(11):1890–900. doi: 10.3324/haematol.2017.170571 (PMC5664393; doi:10.3324/haematol.2017.170571), 2017-11
Supplement: 2017_170571-Disclosures_and_Contributions.pdf [file 2017_170571-Disclosures_and_Contributions.pdf]

Haematologica  
HAEMATOL/2017/170571  
Version 3

SYK inhibition thwarts the BAFF - B-cell receptor crosstalk and thereby antagonizes Mcl-1 in chronic lymphocytic leukemia

Cody Paiva, Taylor A. Rowland, Bhargava Sreekantham, Claire Godbersen, Scott R. Best, Prabhjot Kaur, Marc M. Loriaux, Stephen E. F. Spurgeon, Olga V. Danilova, and Alexey V. Danilov

Disclosures: AVD is supported by the Lymphoma Research Foundation Clinical Investigator Career Development Award. MML and SEFS receive funding from SWOG/HOPE foundation and the Leukemia and Lymphoma Society

Contributions: AVD designed research, analyzed the data and wrote the paper; CR, TR, BS, CG, SRB and OVD performed research. PK, MML, SEFS and OVD contributed vital reagents and analyzed the data.
